# Supplementary material for: Coffee Intake and Obesity: A Meta-Analysis
Source: PubMed Central journal article supplement (PMC6628169; doi:10.3390/nu11061274), 2019-06-05
Supplement: nutrients-11-01274-s001.pdf [file nutrients-11-01274-s001.pdf]

**Supplementary table 1. Database search strategy**

|               |                                                                                                                                                                                                                                                                                                                                                                                                                                                                                                                                                                                                                                                                                                                                                                                                                                                                                          |
|---------------|------------------------------------------------------------------------------------------------------------------------------------------------------------------------------------------------------------------------------------------------------------------------------------------------------------------------------------------------------------------------------------------------------------------------------------------------------------------------------------------------------------------------------------------------------------------------------------------------------------------------------------------------------------------------------------------------------------------------------------------------------------------------------------------------------------------------------------------------------------------------------------------|
| <b>PubMed</b> | ( "Coffee"[Mesh] OR "Caffeine"[Mesh] OR coffee[tw] OR caffeine[tw] OR decaffeinated[tw] OR fluid intake[tw] OR tea[tw] ) AND ("Body Weight"[Mesh] OR weight[tw] OR weight loss*[tw] OR weight gain*[tw] OR weight change*[tw] OR anthropometry[tw] OR birth weight[tw] OR birthweight[tw] OR birth-weight[tw] OR obesity[tw] OR obese[tw] OR overweight[tw] OR over-weight[tw] OR body composition[tw] OR body mass index[tw] OR BMI[tw] OR fat mass[tw] OR muscle mass[tw] OR waist circumference[tw] OR fat distribution[tw] OR hip circumference[tw] OR waist hip ratio*[tw] OR skinfold measurement*[tw] OR skinfold thickness[tw] OR DEXA[tw] OR bio-impedance[tw] ) NOT (Case Reports[ptyp] OR Comment[ptyp] OR Letter[ptyp] OR Editorial[ptyp]) NOT ( "animals" [Mesh] NOT "humans" [Mesh] )                                                                                      |
| <b>Embase</b> | ( "Coffee"/exp OR "Caffeine"/exp OR coffee:ti,ab OR caffeine:ti,ab OR decaffeinated:ti,ab OR fluid intake:ti,ab OR tea:ti,ab ) AND ("Body Weight"/exp OR "obesity"/exp OR weight:ti,ab OR 'weight loss*':ti,ab OR 'weight gain*':ti,ab OR 'weight change*':ti,ab OR anthropometry:ti,ab OR 'birth weight':ti,ab OR birthweight:ti,ab OR birth-weight:ti,ab OR obesity:ti,ab OR obese:ti,ab OR overweight:ti,ab OR over-weight:ti,ab OR 'body composition':ti,ab OR 'body mass index':ti,ab OR BMI:ti,ab OR 'fat mass':ti,ab OR 'muscle mass':ti,ab OR 'waist circumference':ti,ab OR 'fat distribution':ti,ab OR 'hip circumference':ti,ab OR 'waist hip ratio*':ti,ab OR 'skinfold measurement*':ti,ab OR 'skinfold thickness':ti,ab OR DEXA:ti,ab OR bio-impedance:ti,ab ) NOT ('case report'/de OR 'editorial'/de OR 'letter'/de OR 'review'/de) NOT ([animals]/lim NOT [humans]/lim) |

Supplementary table 2. Characteristics of studies included

| First author,<br>Year,<br>Country,<br>Reference | Cohort name,<br>Study period | Analysis<br>Design          | Sex,<br>Age<br>at<br>baseline<br>(years) | Outcome definition | Diet assessment<br>method<br>(validation) | Highest vs<br>lowest<br>coffee intake<br>(cups/day) | RR (95% CI)<br>or<br>Mean<br>difference<br>(95% CI) | Variables adjusted for                                                                                                                                                                             |
|-------------------------------------------------|------------------------------|-----------------------------|------------------------------------------|--------------------|-------------------------------------------|-----------------------------------------------------|-----------------------------------------------------|----------------------------------------------------------------------------------------------------------------------------------------------------------------------------------------------------|
| Larsen<br>2018<br>Denmark                       | MONICA<br>Study              | Cross-sectional<br>analysis | M<br>46                                  | Continuous BMI     | FFQ                                       | per 1 cup/day                                       | -0.05<br>(-0.09, -0.02)                             | age, sex, total energy intake,<br>current smoking, and<br>habitual physical activity,<br>smoking status, physical<br>activity, school education,<br>gender, menopausal status<br>for women, height |
|                                                 |                              |                             |                                          | Continuous WC      |                                           | per 1 cup/day                                       | -0.22<br>(-0.35, -0.09)                             |                                                                                                                                                                                                    |
|                                                 |                              |                             | W<br>46                                  | Continuous BMI     |                                           | per 1 cup/day                                       | -0.03<br>(-0.08, 0.02)                              |                                                                                                                                                                                                    |
|                                                 |                              |                             |                                          | Continuous WC      |                                           | per 1 cup/day                                       | -0.22<br>(-0.39, -0.05)                             |                                                                                                                                                                                                    |

|                                 |                                          |                             |                  |                                        |                |                      |                                        |                                                                                                                                             |
|---------------------------------|------------------------------------------|-----------------------------|------------------|----------------------------------------|----------------|----------------------|----------------------------------------|---------------------------------------------------------------------------------------------------------------------------------------------|
| Kim<br>2017<br>South Korea      | KNHANES<br>2009 - 2010                   | Cross-sectional<br>analysis | M<br>≤ 40        | Binary BMI<br>(overall obesity: ≥25)   | FFQ            | ≥ 3 vs. < 1          | 1.25<br>(0.95, 1.66)                   | age, smoking, alcohol intake,<br>macronutrient intake,<br>exercise, family income                                                           |
|                                 |                                          |                             |                  | Binary WC<br>(central obesity: ≥90cm)  |                |                      | ≥ 3 vs. < 1                            |                                                                                                                                             |
|                                 |                                          |                             | W<br>≤ 40        | Binary BMI<br>(overall obesity: ≥25)   | ≥ 3 vs. < 1    | 1.57<br>(1.18, 2.10) |                                        |                                                                                                                                             |
|                                 |                                          |                             |                  | Binary WC<br>(central obesity: ≥85cm)  |                | ≥ 3 vs. < 1          | 1.33<br>(1.01, 1.75)                   |                                                                                                                                             |
| Lee<br>2017<br>South Korea      | KNCC<br>2007 - 2016                      | Cross-sectional<br>analysis | W<br>30 - 70     | Binary BMI<br>(overall obesity: ≥25)   | FFQ            | ≥ 3 vs. 0            | 2.54<br>(1.96, 3.28)                   | age, level, occupation,<br>alcohol, smoking status,<br>regular exercise, total calorie<br>intake, use of the sugar and<br>creamer additives |
|                                 |                                          |                             |                  | Binary WC<br>(central obesity: ≥80cm)  |                |                      | ≥ 3 vs. 0                              |                                                                                                                                             |
| Shin<br>2017<br>South Korea     | KNHANES<br>2013 - 2014                   | Cross-sectional<br>analysis | M<br>20 ≤        | Binary WC<br>(central obesity: > 90cm) | FFQ            | ≥ 3 vs. < 1          | 0.46<br>(0.14, 1.57)                   | age, BMI, household income,<br>education, alcohol, smoking,<br>exercise, daily caloric intake.                                              |
|                                 |                                          |                             |                  | W<br>20 ≤                              |                |                      | Binary WC<br>(central obesity: > 85cm) |                                                                                                                                             |
| Nordestgaard<br>2015<br>Denmark | CGPS, CCHS<br>1991 - 1994<br>2001 - 2003 | Cross-sectional<br>analysis | M + W<br>42 - 71 | Binary BMI<br>(overall obesity: >30)   | Questionnaires | > 5 vs. 0            | 1.02<br>(0.94, 1.11)                   | age, sex, smoking, physical<br>activity, antihypertensive and<br>lipid-lowering medication to<br>estimate associations of                   |

|                          |                                                 |                             |                  |                                                                             |     |               |                      |                                                                                                                                                                  |
|--------------------------|-------------------------------------------------|-----------------------------|------------------|-----------------------------------------------------------------------------|-----|---------------|----------------------|------------------------------------------------------------------------------------------------------------------------------------------------------------------|
|                          |                                                 |                             |                  |                                                                             |     |               |                      | coffee intake with BMI, WC, weight, height, systolic and diastolic blood pressure, plasma triglycerides, high-density lipoprotein cholesterol and plasma glucose |
| Grosso<br>2014<br>Italy  | Sicily<br>mediterranean<br>study<br>2009 - 2010 | Cross-sectional<br>analysis | M + W<br>50      | Binary WC<br>(central obesity: WC<br>≥90cm in men and WC≥<br>80cm in women) | FFQ | > 2 vs. 0     | 1.23<br>(0.80, 1.89) | age, gender, energy intake, adherence to the Mediterranean diet (MedDietScore), smoking habit and physical activity                                              |
| Grosso<br>2015<br>Poland | HAIPEE<br>2002 - 2005                           | Cross-sectional<br>analysis | M<br>45 - 69     | Binary WC<br>(central obesity: ≥90cm)                                       | FFQ | > 2 vs. < 1   | 0.81<br>(0.68, 0.98) | age, energy intake, educational level, occupational level, alcohol consumption, tea consumption, smoking habit and physical activity                             |
|                          |                                                 |                             | W<br>45 - 69     | Binary WC<br>(central obesity: ≥ 80cm)                                      |     | > 2 vs. < 1   | 0.90<br>(0.76, 1.07) |                                                                                                                                                                  |
| Takami<br>2013<br>Japan  | J-MICC                                          | Cross-sectional<br>analysis | M + W<br>35 - 70 | Binary WC<br>(central obesity: WC<br>≥90cm in men and WC≥<br>85cm in women) | FFQ | ≥ 3 vs. < 1.5 | 0.93<br>(0.58, 1.49) | age, sex, total energy intake, physical activity, smoking and drinking habits                                                                                    |

|                            |                                         |                             |               |                |                         |                            |                         |                                                                                                                                                                        |
|----------------------------|-----------------------------------------|-----------------------------|---------------|----------------|-------------------------|----------------------------|-------------------------|------------------------------------------------------------------------------------------------------------------------------------------------------------------------|
| Bouchard<br>2010<br>USA    | NHANES                                  | Cross-sectional<br>analysis | M<br>18 ≤     | Continuous BMI | Questionnaires          | ≥2 vs. 0                   | 0.40<br>(-0.42, 1.22)   | age, gender, ethnicity,<br>smoking, alcohol, physical<br>activity, diet quality index,<br>total calorie intake, and the<br>frequency of coffee and tea<br>consumption. |
|                            |                                         |                             |               | Continuous WC  |                         | ≥2 vs. 0                   | 0.73<br>(-1.37, 2.83)   |                                                                                                                                                                        |
|                            |                                         |                             | W<br>18 ≤     | Continuous BMI | ≥2 vs. 0                | -0.98<br>(-1.83, -0.13)    |                         |                                                                                                                                                                        |
|                            |                                         |                             | Continuous WC | ≥2 vs. 0       | -1.96<br>(-3.85, -0.07) |                            |                         |                                                                                                                                                                        |
| Balk<br>2009<br>Netherland | AGAHLS                                  | Cohort<br>analysis          | M<br>27 - 42  | Continuous WC  | Questionnaires          | >6 vs. ≤2                  | 2.30<br>(-2.80, 7.40)   | energy intake, physical<br>activity, smoking and alcohol<br>consumption                                                                                                |
|                            |                                         |                             |               | W<br>27 - 42   |                         | Continuous WC              | >6 vs. ≤2               |                                                                                                                                                                        |
| Hino<br>2007<br>Japan      | Tanushimaru<br>Seven country<br>studies | Cross-sectional<br>analysis | M + W<br>40 ≤ | Continuous WC  | FFQ                     | Increased vs.<br>Decreased | -1.25<br>(-2.30, -0.20) | age, sex, total energy intake,<br>alcohol intake, current<br>smoking, habitual physical<br>activity                                                                    |

|                      |                    |                             |            |                |     |                            |                         |                                                                                                                                                                                                                                                                                                                                                       |
|----------------------|--------------------|-----------------------------|------------|----------------|-----|----------------------------|-------------------------|-------------------------------------------------------------------------------------------------------------------------------------------------------------------------------------------------------------------------------------------------------------------------------------------------------------------------------------------------------|
| Lopez-Garcia<br>2006 | NHS<br>1986 – 1998 | Cross-sectional<br>Analysis | M<br>40-75 | Continuous BMI | FFQ | Increased vs.<br>Decreased | -0.10<br>(-0.22, -0.02) | age, BMI at baseline,<br>smoking status, physical<br>activity, alcohol intake<br>(quintiles), quintiles of<br>baseline and change in<br>trans-fat intake, glycemic<br>load, total fiber and whole-<br>grain intakes, and quartiles<br>of baseline and change in<br>low- and high-calorie soft<br>drink intake, and fruit and<br>vegetable consumption |
|                      |                    |                             | W<br>30-55 | Continuous BMI |     | Increased vs.<br>Decreased | -0.16<br>(-0.24, -0.08) |                                                                                                                                                                                                                                                                                                                                                       |

---

#### Abbreviations

AGAHLs: Amsterdam Growth and Health Longitudinal Study, BMI: Body Mass Index, CGPS: Copenhagen General Population Study, FFQ: Food Frequency Questionnaire, HAPIEE: Health, Alcohol and Physiological factors In Eastern Europe, J-MICC: The Japan Multi Institutional Cohort Study, KNCC: Korean National Cohort Study, KNHANES: The Korea National Health and Nutrition Examination Survey, NHANES: National Health and Nutrition Examination Survey, NHS: National Health Service

No.: Number, OR: Odds Ratio, RR: Risk Ratio, SD: Standard Deviation, WC: Waist Circumference
